# Supplementary material for: Metal-Organic Frameworks to Metal/Metal Oxide Embedded Carbon Matrix: Synthesis, Characterization and Gas Sorption Properties
Source: MDPI journal article supplement (doi:10.3390/ma8085245), 2015-08-19
Supplement: s1 [file s1]

## Supplementary Materials

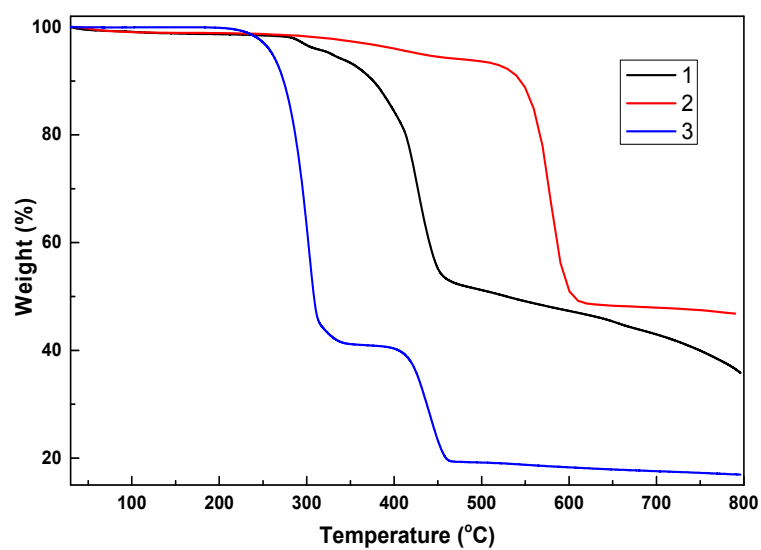

**Figure S1.** TGA for compounds **1–3**.

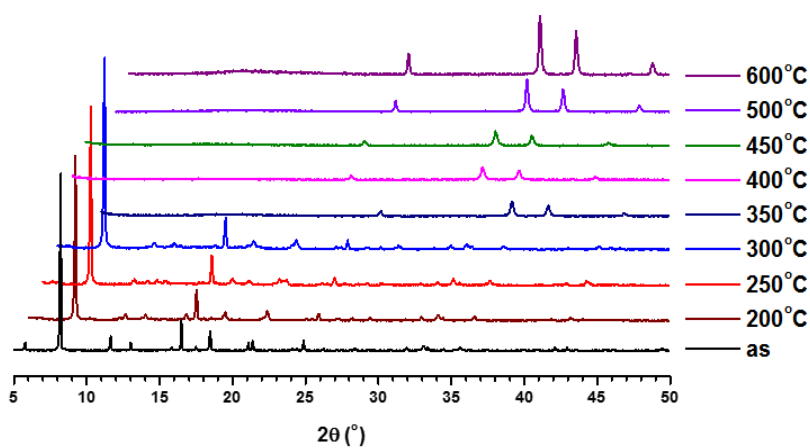

**Figure S2.** Varied temperatures PXRD patterns of **1**.

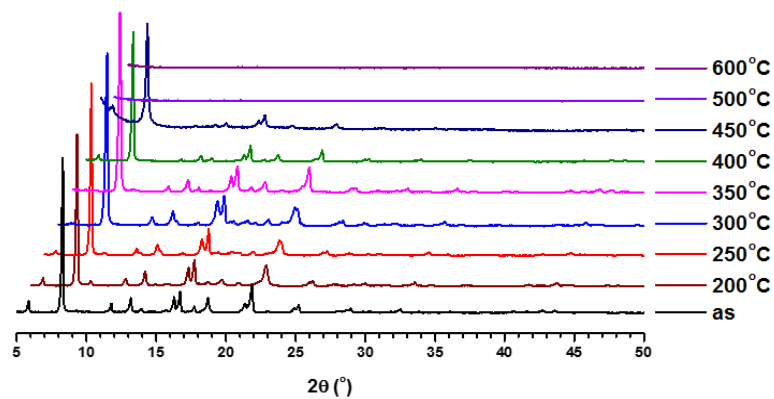

**Figure S3.** Varied temperatures PXRD patterns of **2**.

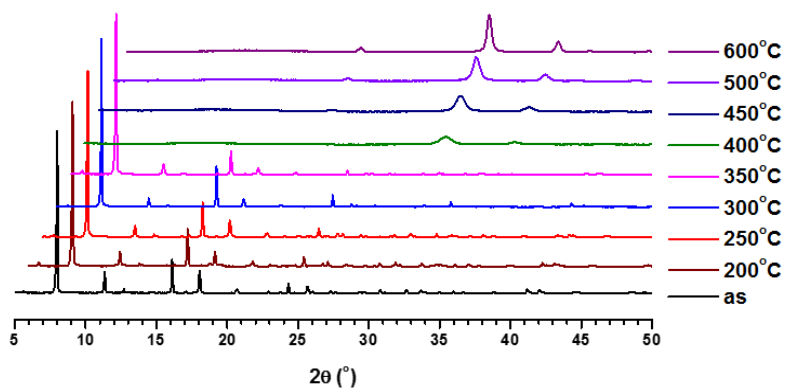

**Figure S4.** Varied temperatures PXRD patterns of **3**.

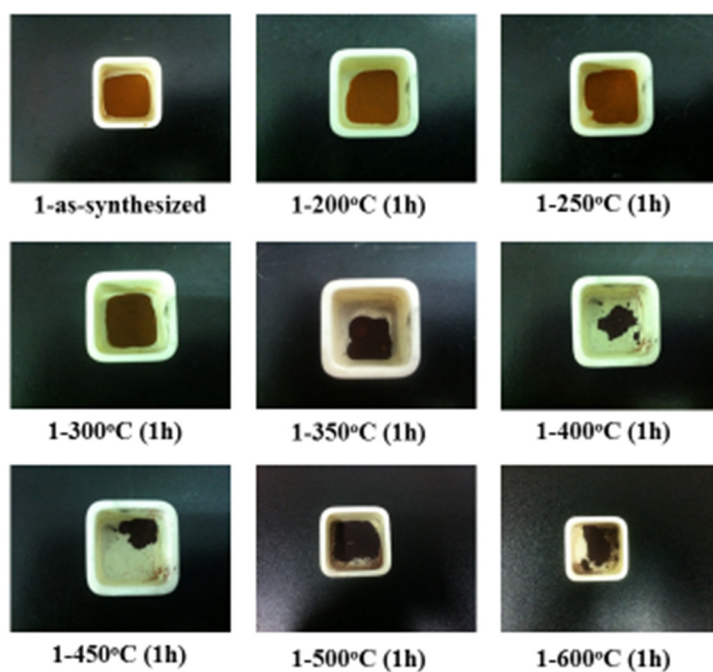

**Figure S5.** Photos of **1** after calcination at various temperatures for one hour.

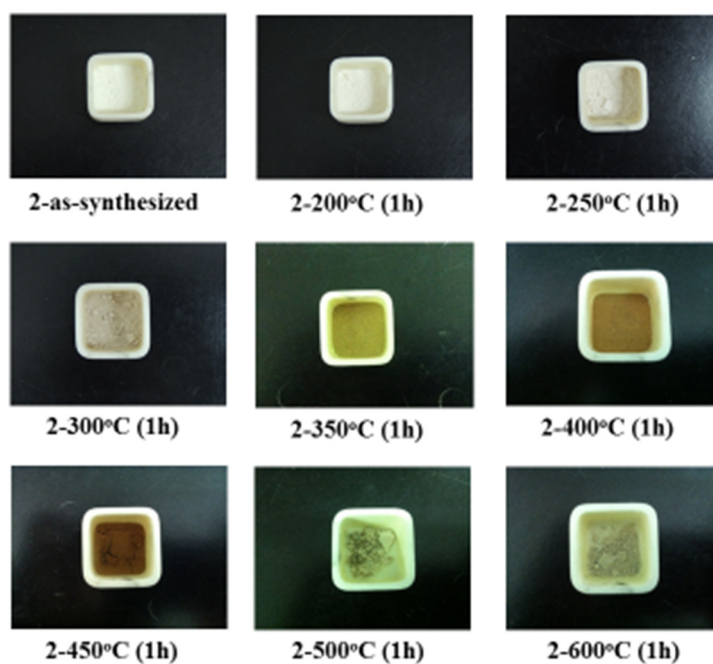

**Figure S6.** Photos of **2** after calcination at various temperatures for one hour.

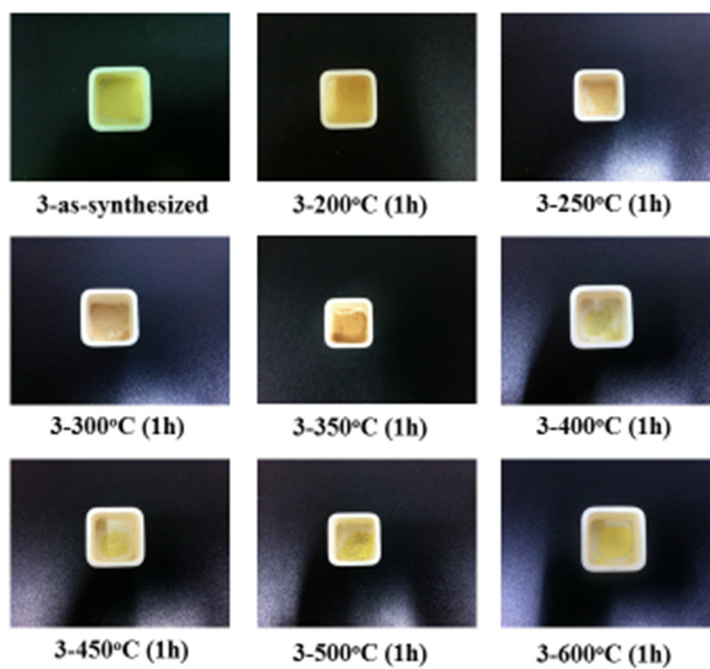

**Figure S7.** Photos of **3** after calcination at various temperatures for one hour.

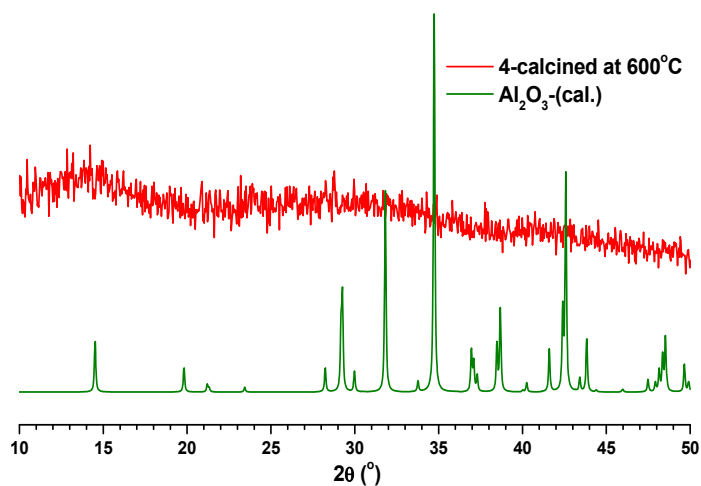

**Figure S8.** Comparison of PXRD pattern of **2** calcined at 600 °C with calculated PXRD pattern of  $\text{Al}_2\text{O}_3$ .

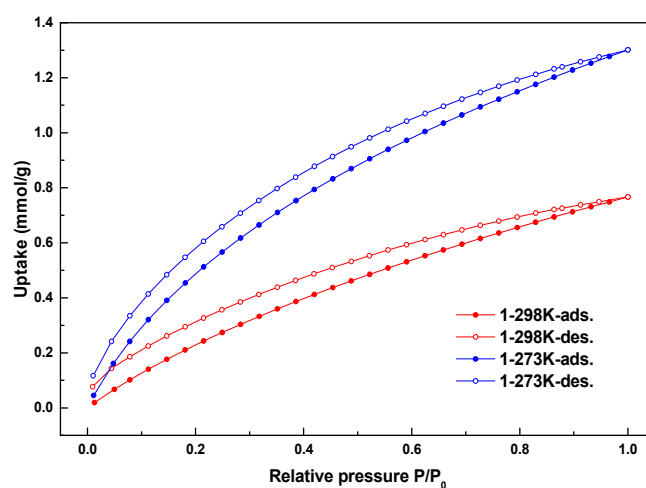

**Figure S9.** The  $\text{CO}_2$  gas sorption isotherms for **1** at 273 K and 298 K.

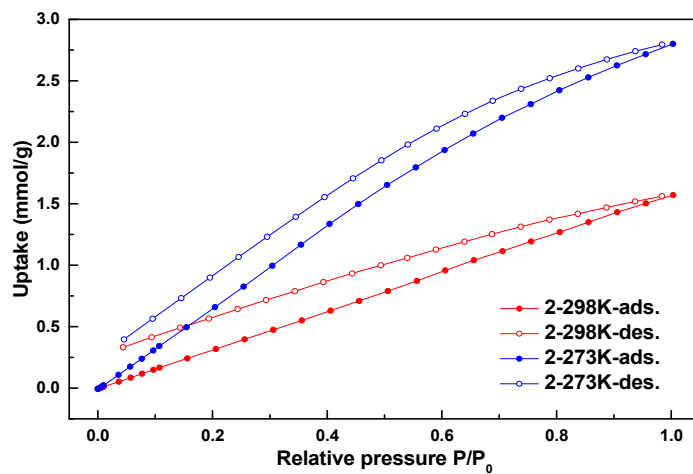

**Figure S10.** The  $\text{CO}_2$  gas sorption isotherms for **2** at 273 K and 298 K.

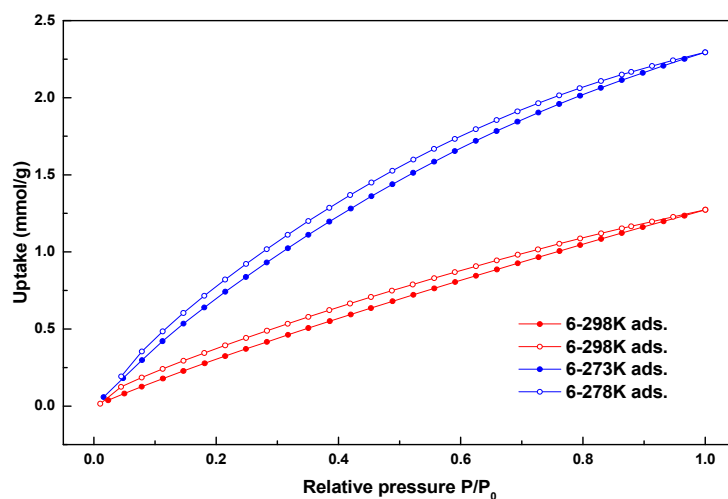

**Figure S11.** The CO<sub>2</sub> gas sorption isotherms for **3** at 273 K and 298 K.

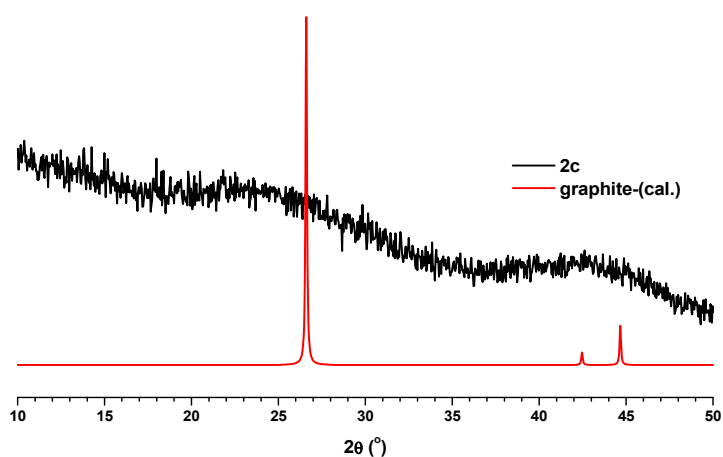

**Figure S12.** Comparison of PXRD pattern of **2c** with calculated PXRD pattern of Graphite.

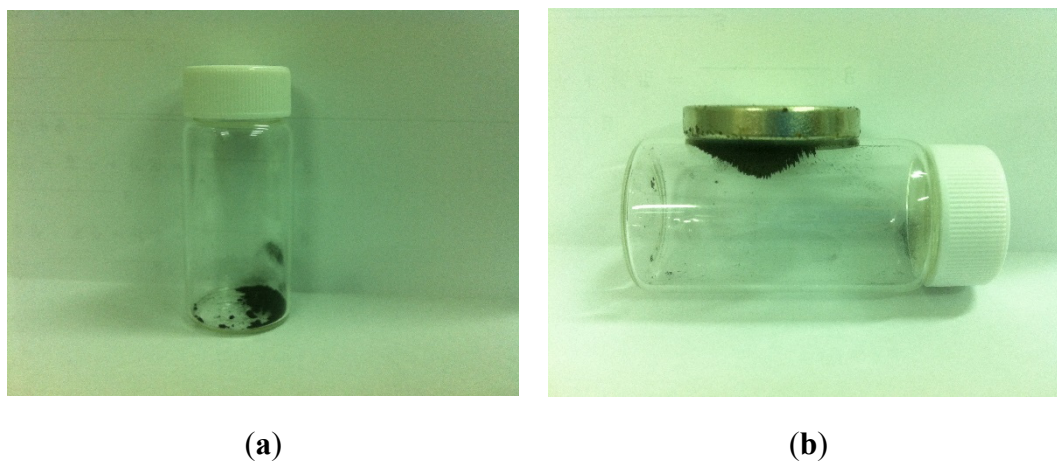

**Figure S13.** Photos of **1c** without magnetic field (a) and with magnetic field (b).

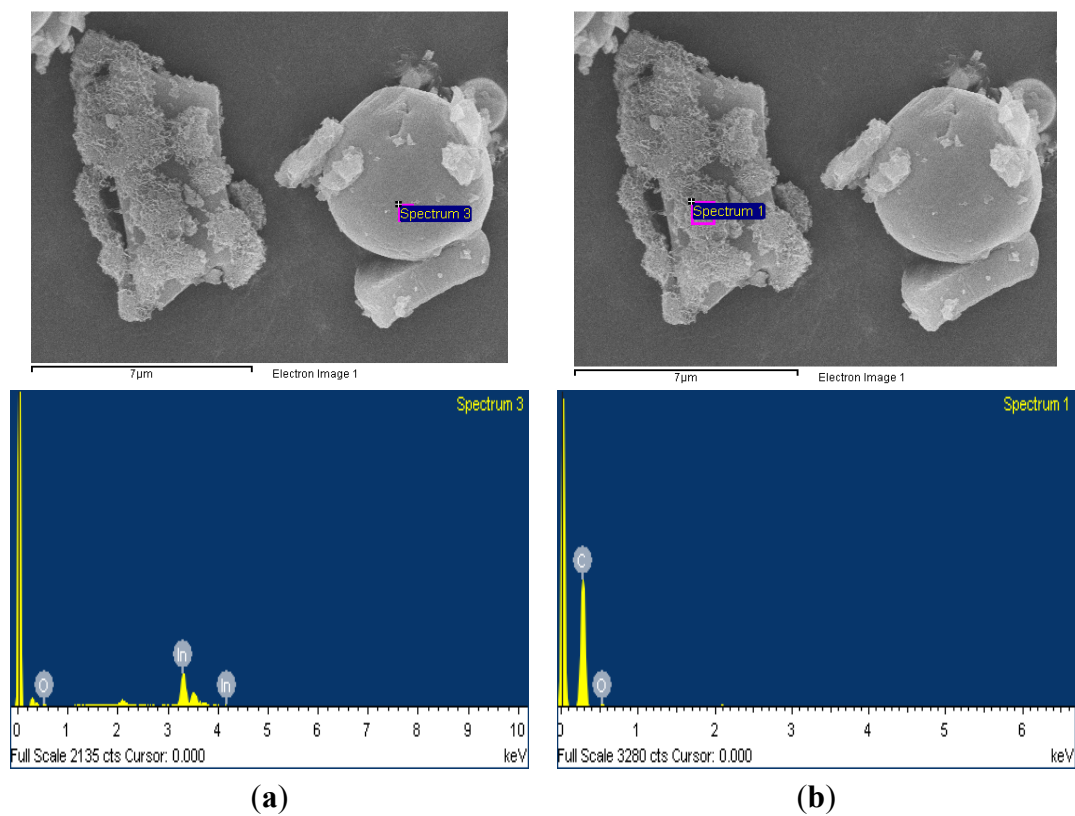

| (a)     |            |            | (b)     |            |            |
|---------|------------|------------|---------|------------|------------|
| Element | Weight (%) | Atomic (%) | Element | Weight (%) | Atomic (%) |
| C       | 93.22      | 94.83      | C       | 0.00       | 0.00       |
| O       | 6.78       | 5.17       | O       | 4.36       | 24.67      |
| In      | 0.00       | 0.00       | In      | 95.64      | 75.33      |

**Figure S14.** The EDS analysis results for **3c** at two different places of SEM images (a) and (b).
